# Supplementary material
Source: publisher site journal article supplement (https://www.kjim.org/upload/media/kjim-2017-034-suppl1.pdf)
Supplement: Supplementary file 1 [file kjim-2017-034-suppl1.pdf]

**Supplementary Table 1. Instruments in each participating laboratory**

| Laboratory | Instrument        | Manufacturer                                        |
|------------|-------------------|-----------------------------------------------------|
| GC Labs    | Modular analytics | Roche Diagnostics, Mannheim, Germany                |
| A          | Cobas 8000, c702  | Roche Diagnostics, Mannheim, Germany                |
| B          | TBA-2000FR        | Toshiba Medical Systems Corporation, Tochigi, Japan |
| C          | ADVIA1800         | Siemens Healthcare Diagnostics, Marburg, Germany    |
| D          | TBA-2000FR        | Toshiba Medical Systems Corporation, Tochigi, Japan |
| E          | Cobas 8000, c702  | Roche Diagnostics, Mannheim, Germany                |
| F          | TBA 200FR NEO     | Toshiba Medical Systems Corporation, Tochigi, Japan |
| G          | Cobas 8000, c702  | Roche Diagnostics, Mannheim, Germany                |
| H          | TBA-2000FR        | Toshiba Medical Systems Corporation, Tochigi, Japan |
| I          | TBA-2000FR        | Toshiba Medical Systems Corporation, Tochigi, Japan |

GC Labs, Green Cross Laboratories.
